# Supplementary material for: Silica Bifunctional Supports for the Direct Synthesis of H2O2: Optimization of Br/Acid Sites and Pd/Br Ratio
Source: MDPI journal article supplement (doi:10.3390/catal12070796), 2022-07-19
Supplement: s1 [file s1]

## *Supplementary Material*

### **Silica bifunctional supports for the direct synthesis of H<sub>2</sub>O<sub>2</sub>; optimization of Br/acid sites and Pd/Br ratio**

**Gema Blanco-Brieva,<sup>a</sup> Frederique Desmedt,<sup>b</sup> Pierre Miquel,<sup>‡b</sup> Jose M. Campos-Martin,<sup>a\*</sup> and Jose L. G. Fierro,<sup>§a</sup>**

<sup>a</sup> Sustainable Energy and Chemistry Group. Instituto de Catálisis y Petroleoquímica, CSIC, Marie Curie, 2, Cantoblanco, 28049 Madrid, Spain. <http://www.icp.csic.es/eqs/>

<sup>b</sup> Solvay, Rue de Ransbeek, 310, B-1120 Brussels, Belgium

<sup>‡</sup> Deceased (1982–2016). <sup>§</sup> Deceased (1948–2020).

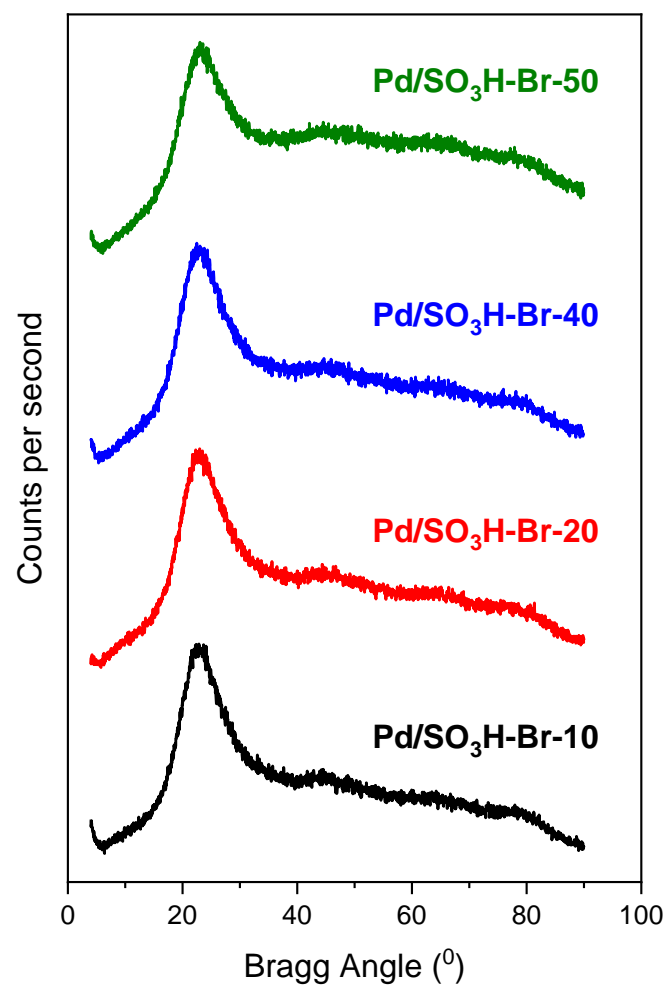

**Figure S1** XRD profiles of the catalysts prepared.
